# Supplementary material
Source: PubMed Central journal article supplement (PMC3308013)
Supplement: NIHMS353429-supplement-Supplemental_Figure_1.pdf [file NIHMS353429-supplement-Supplemental_Figure_1.pdf]

## Supplemental Figure 1

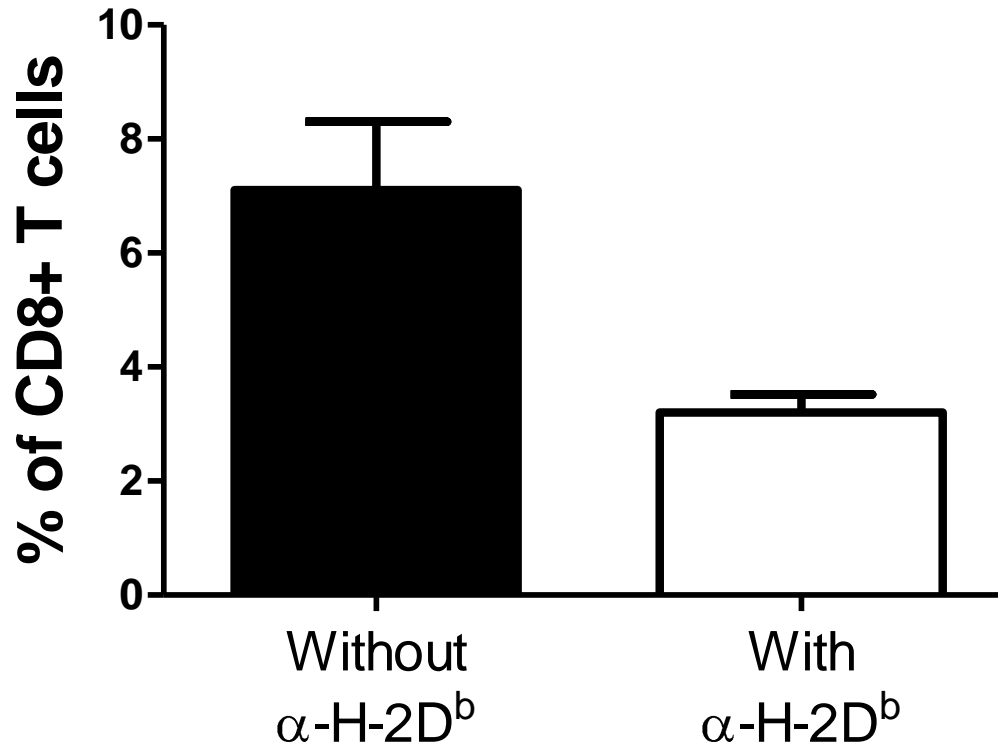

**Supplementary Figure 1.** ICP8<sub>168-176</sub> and ICP8<sub>171-178</sub> are separate epitopes. Fibroblasts were first pulsed with ICP8<sub>168-176</sub> and ICP8<sub>171-178</sub> for 30 min at 37°C in the presence or absence of anti-H-2Db blocking antibody. Dispersed TG were incubated with equal numbers of ICP8<sub>168-176</sub> and ICP8<sub>171-178</sub> pulsed fibroblasts for 6 hr in the presence of Golgi-Plug, followed by intracellular staining for IFN- $\gamma$ . Bars represent % of CD8+ T cells that produce IFN- $\gamma$   $\pm$  SEM (n=2)
